# Supplementary material
Source: PubMed Central journal article supplement (PMC5235385)

Supplementary Figure E1

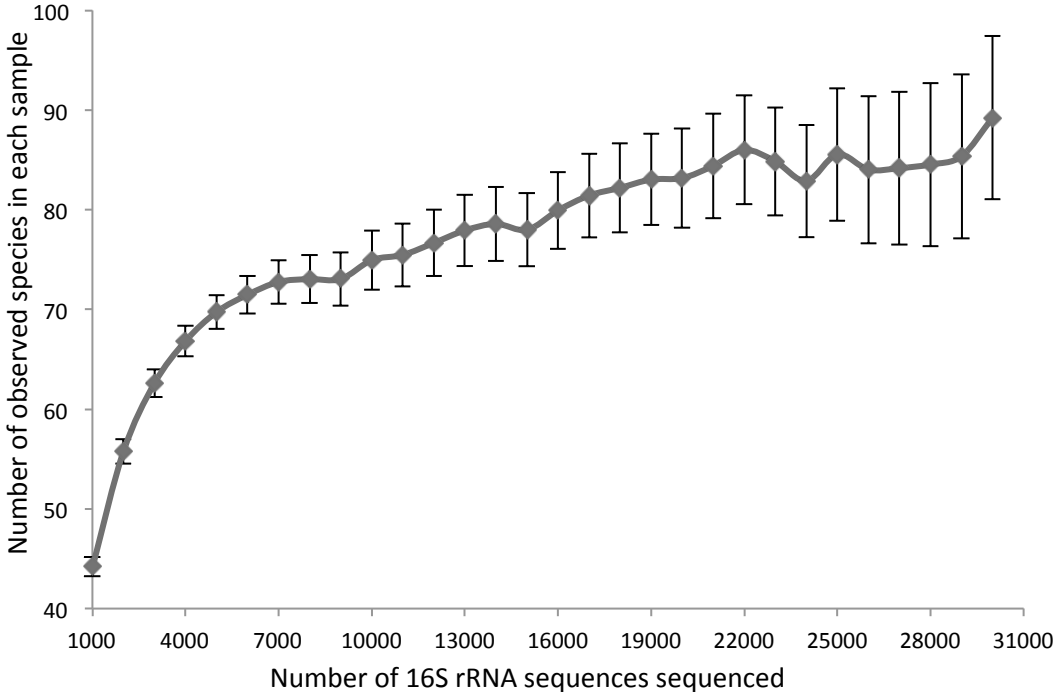

Supplement: NIHMS800800-supplement-2.pdf [file NIHMS800800-supplement-2.pdf]

Supplementary Figure E2

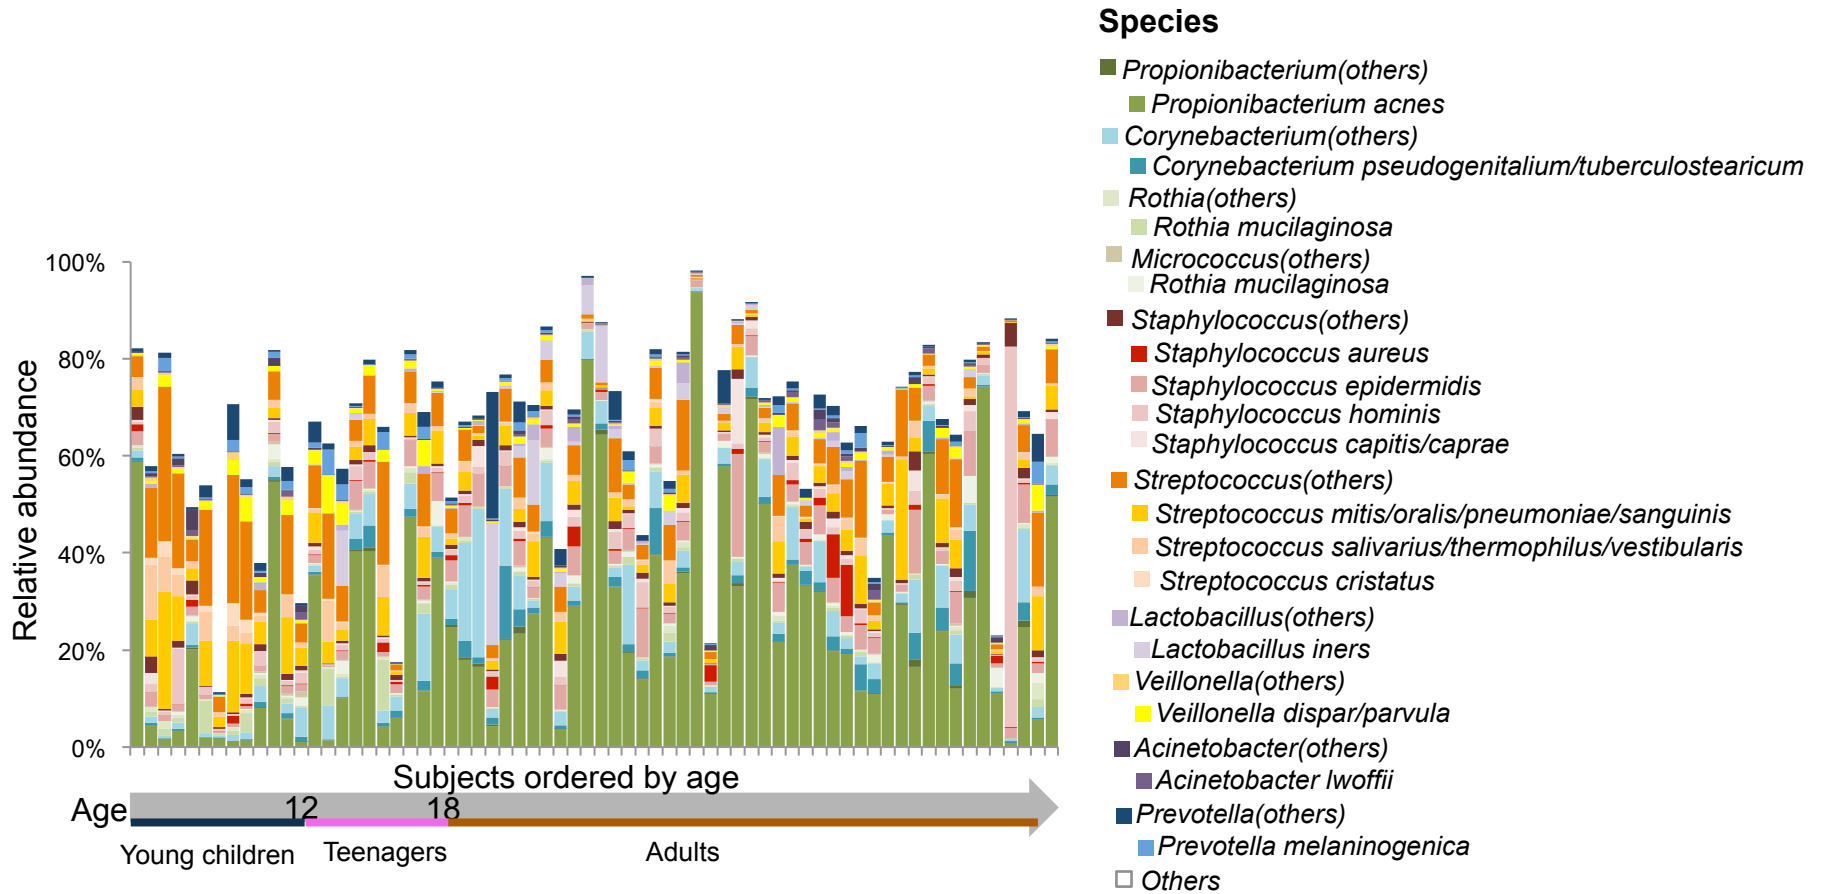

Supplement: NIHMS800800-supplement-3.pdf [file NIHMS800800-supplement-3.pdf]

Supplementary Figure E3

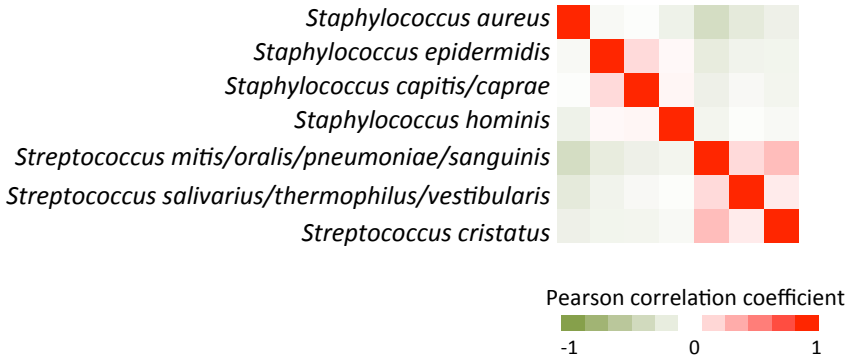

Supplement: NIHMS800800-supplement-4.pdf [file NIHMS800800-supplement-4.pdf]

Supplementary Figure E4

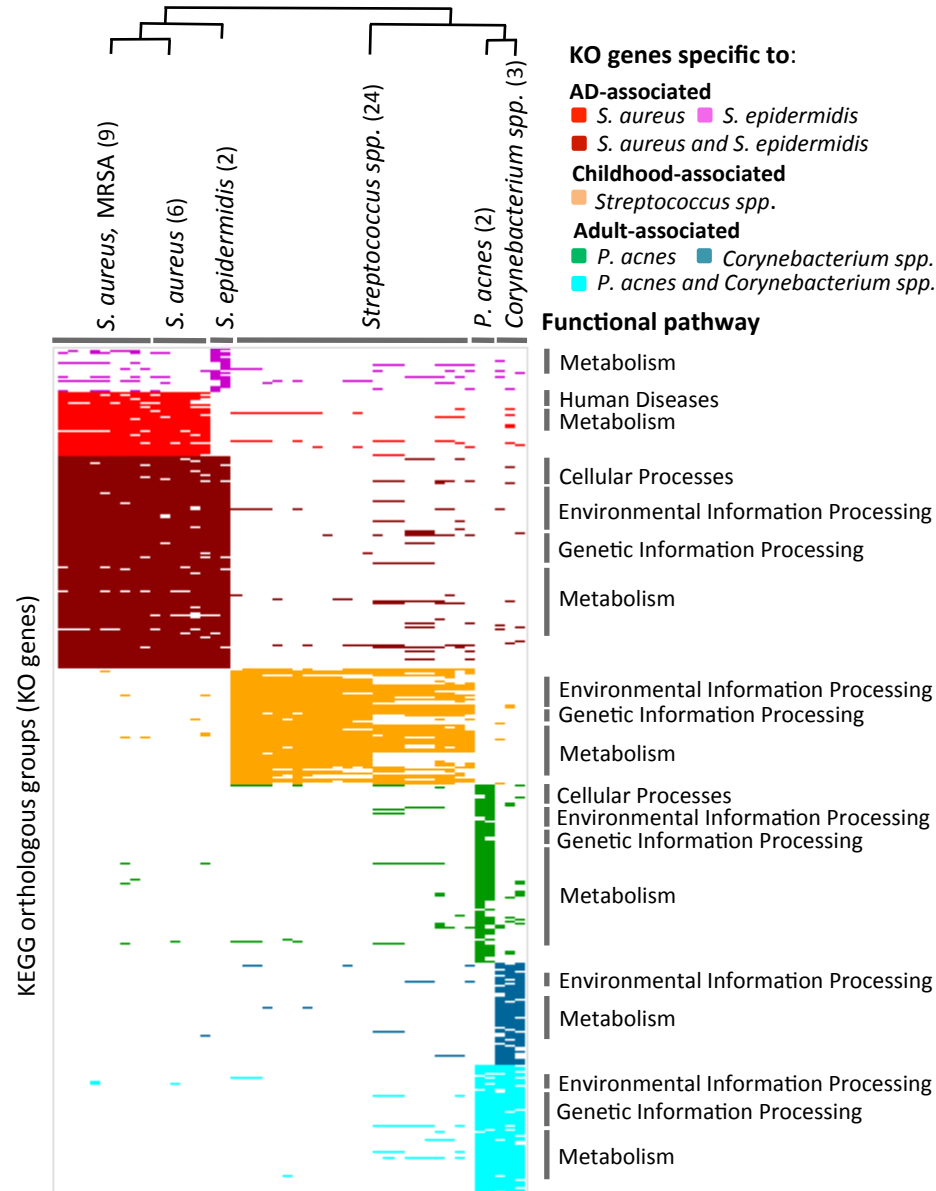

Supplement: NIHMS800800-supplement-5.pdf [file NIHMS800800-supplement-5.pdf]
